# Supplementary material
Source: Springer Nature journal article supplement (https://www.springermedizin.de/resource/supplementary/13256_2012_2261_MOESM1_ESM.pdf/9649402)

■ Troponin T ( $\mu\text{g/L}$ )

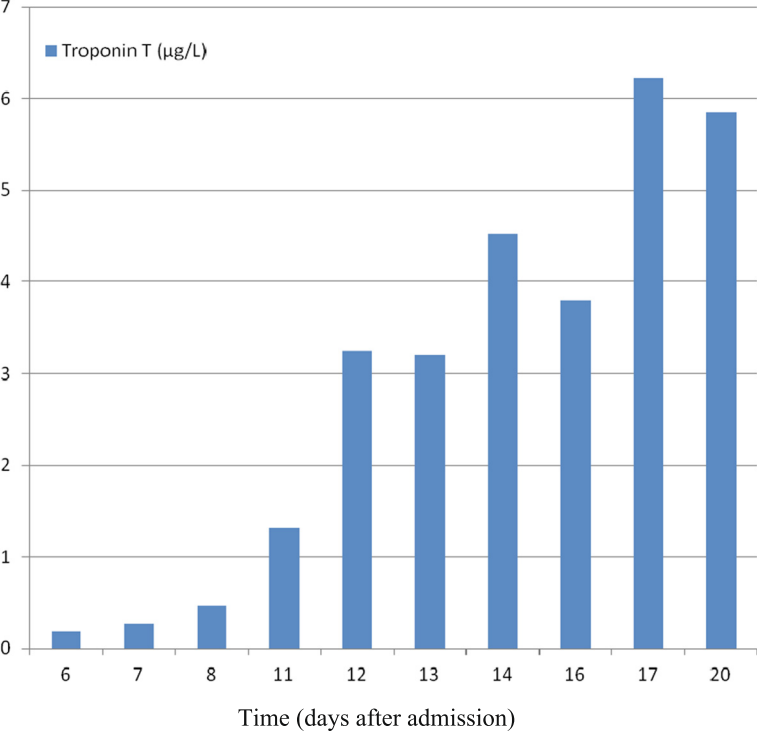

Time (days after admission)

Supplement: MOESM1 [file 9649402]
